22 **Abstract**

23 **Introduction**

24 Human adenoviruses type F (HAdV-F) are leading cause of childhood diarrhoeal deaths.  
25 Genomic analysis would be key for understanding their potential drivers of disease severity,  
26 transmission dynamics, and for vaccine development. However, currently there is only limited  
27 data on HAdV-F genomes globally.

28  
29 **Methods**

30 Here, we sequenced and analysed HAdV-F from stool samples collected in coastal Kenya  
31 between 2013 and 2022. The samples were collected at Kilifi County Hospital in Kilifi, Kenya,  
32 from children < 13 years of age who reported a history of  $\geq 3$  loose stools in the previous  
33 24hrs. The genomes were compared with data from the rest of the world by phylogenetic  
34 analysis and mutational profiling. Genotypes and lineages were assigned based on clustering  
35 on the global phylogenetic tree and from previously described nomenclature. Participant  
36 clinical and demographic data were linked to genotypic data.

37  
38 **Results**

39 Of 91 cases identified using real-time PCR, 83 near-complete genomes were assembled, and  
40 these classified into HAdV-F40 and F41. These genotypes cocirculated throughout the study  
41 period. Three and four distinct lineages were observed for HAdV-F40 (Lineage 1-3) and F41  
42 (Lineage 1, 2A, 3A, 3C and 3D). Genotype F40 and F41 coinfections were observed in five  
43 samples, and F41 and B7 in one sample. Two children with F40 and 41 coinfections were also  
44 infected with rotavirus and had moderate and severe disease, respectively. Intratypic  
45 recombination was found in 4 HAdV-F40 sequences occurring between lineages 1 and 3. None  
46 of the HAdV-F41 cases had jaundice.

47  
48 **Interpretation**

49 This study provides evidence of extensive genetic diversity, coinfections and recombination  
50 within HAdV-F40 in a high adenovirus transmission setting that will inform public health  
51 policy, vaccine development that includes the locally circulating lineages, and molecular  
52 diagnostic assay development. We recommend future comprehensive studies elucidating on  
53 HAdV-F genetic diversity and immunity for rational vaccine development.

## 54 **Background**

55 Human enteric adenovirus (HAdV) species F is a leading cause of paediatric viral diarrhoea  
56 and deaths globally (1). In 2019, a total of 83,491 deaths from HAdV-F were recorded globally  
57 (95% CI 43,914–143,867) in children below 14 years of age (1). Clinical isolates of HAdV-F can  
58 be classified into two genotypes (40 and 41) based on genetic differences (2,3). In Kenya, the  
59 positivity rate of HAdV-F40/41 in hospitalised <13 year-olds diarrhoeal stools was estimated  
60 at 5.8% (95% CI: 3.2-9.6) and 7.3% (95% CI: 5.2-10.1) pre- and post-rotavirus vaccine  
61 introduction, respectively (4). Cases were observed in all years studied, with peaks in dry  
62 months (5).

63

64 HAdV-F40/41 are double-stranded DNA viruses with short and long fiber proteins distinct  
65 from other adenoviruses (A-G). The genome of HAdV-F40/41 is approximately 35,000 base-  
66 pairs (6). Previously there have been HAdV studies in Ethiopia, Albania, China, India and Brazil  
67 following which the researchers have reported a higher prevalence in HAdV-F41 cases  
68 compared to F40 (7–11). Coinfections between F40 and F41, and F41 and C5 were reported  
69 in Brazil and Ethiopia (7,10). However, there are limited data on the clinical implications  
70 among individuals HAdV-F coinfections.

71

72 The emergence of new adenovirus strains due to recombination has been previously  
73 described in adenovirus species B, C and D (12–15). Intertypic recombination has not been  
74 reported in HAdV-F genotypes but intratypic recombination in HAdV F41 lineage 3b  
75 sequences has been shown to occur around the short fiber region (16). Since early 2022,  
76 HAdV-F41 has been associated with severe paediatric hepatitis, either due to triggering a  
77 dysregulated immune response that led to liver injury or through an unknown coinfection-  
78 mediated mechanism (17,18).

79

80 Understanding the genomic diversity among HAdV-F genotypes is key for optimization of  
81 molecular diagnostic assays, vaccine development, tracking global spread, and linking viral  
82 variation with disease severity. However, despite HAdV-F being among the top viral causes of  
83 diarrhoea, its genomic diversity is poorly understood due to the limited genomic data globally  
84 (~120 as of September 2022). Notably, in Africa, there are only 10 genotype 40 and 41  
85 complete genomes, all collected from South Africa.

86

87 Here, we aimed to investigate the molecular epidemiology and diversity of HAdV-F40/41 at  
88 the Kenyan Coast utilising 91 HAdV-F positive samples collected between January 2013 and  
89 May 2022 from children admitted to the Kilifi County Hospital (KCH) with diarrhoea.

## 90 **Methods**

### 91 **Study site and population**

92 The samples were collected as part of a prospective hospital-based rotavirus surveillance  
93 study at Kilifi County Hospital paediatric ward in Kilifi, Kenya (4). The target population was  
94 children below 13 years who presented with three or more loose stools in a 24-hour period.  
95 The samples were collected at the hospital then transported and stored at KEMRI-Wellcome  
96 Trust at -80°C.

97

### 98 **Ethical consideration**

99 An informed written consent was obtained from each child's parent/guardian before sample  
100 collection. The study protocol was approved by the Scientific and Ethics Review Unit (SERU)  
101 at Kenya Medical Research Institute, Nairobi (SERU#CGMRC/113/3624).

102

### 103 **Laboratory methods**

#### 104 **Extraction and screening**

105 A total of 91 real-time positive stool samples were retrieved from a -80°C storage. These  
106 included positives in samples collected between January and December 2013 and January  
107 2016 to May 2022. The positives had been identified either by conventional real-time RT-PCR  
108 approach or by custom TaqMan Array cards as previously described (4,5). Briefly, the samples  
109 were extracted from 0.2 grams of specimen (or 200 µL if liquid) using the QIAamp Fast DNA  
110 Stool Mini kit (Qiagen, Manchester, UK) as per the manufacturer's instructions and screened  
111 using the TaqMan Fast Virus 1-Step Master Mix and adenovirus 40/41 specific primers  
112 (Forward primer; 5'-CACTTAATGCTGACACGGGC-3', probe; 'FAM-TGCACCTCTTGGACTAGT-  
113 MGBNFQ', Reverse primer; 5'-ACTGGATAGAGCTAGCGGGC-3'). The thermocycling conditions  
114 were 95 °C for 20 sec and 35 cycles of 94 °C for 15 sec and 60 °C for 30 sec (4). No cut-off in  
115 the cycle threshold value was used during sample selection. In the HAdV-F positives, rotavirus  
116 group A was screened using conventional real-time RT-PCR approach or by custom TaqMan  
117 Array cards as previously described (4,5).

118

#### 119 **Whole genome sequencing**

#### 120 **DNA Amplification**

121 Total nucleic acids (TNA) were amplified using the Q5<sup>®</sup> Hot Start High-Fidelity 2X Master Mix  
122 (NEB) kit. The master mix was prepared as follows: Q5<sup>®</sup> Hot Start High-Fidelity 2X Master Mix  
123 (6.25 $\mu$ l), H<sub>2</sub>O (3 $\mu$ l), Primer pool (1/2/3/4) (2 $\mu$ l) and TNA (1.25 $\mu$ l). The primers were designed  
124 by the Quick group using the ‘Jackhammer’ approach and divided the adenovirus genome into  
125 92 amplicons of 1200bp amplified in four pools ([https://github.com/quick-](https://github.com/quick-lab/HAdV/blob/main/HAdV-F41/v1.0/HAdV-F41_2000jh.primer.bed)  
126 [lab/HAdV/blob/main/HAdV-F41/v1.0/HAdV-F41\\_2000jh.primer.bed](https://github.com/quick-lab/HAdV/blob/main/HAdV-F41/v1.0/HAdV-F41_2000jh.primer.bed)) (19). The reaction was  
127 then incubated on a thermocycler using the following conditions: 98°C for 30 seconds  
128 followed by 35 cycles of 98°C for 15 seconds and 65°C for 5 minutes.

129

### 130 **Library preparation and Sequencing**

#### 131 **Oxford Nanopore Technologies (ONT)**

132 Library preparation was performed using the SQK-LSK109 ligation kit with EXP-NBD196  
133 barcoding kit as previously described ([https://www.protocols.io/view/ncov-2019-](https://www.protocols.io/view/ncov-2019-sequencing-protocol-v3-locost-bp2l6n26rgqe/v3)  
134 [sequencing-protocol-v3-locost-bp2l6n26rgqe/v3](https://www.protocols.io/view/ncov-2019-sequencing-protocol-v3-locost-bp2l6n26rgqe/v3)) (20). Briefly the amplicons were end-  
135 repaired, barcoded using EXP-NBD196 native barcoding expansion kit, pooled into one tube,  
136 adapters ligated to the library and the final library sequenced using the FLOW-MIN106D  
137 R9.4.1 flow cell on the GridION platform (Oxford Nanopore Technologies).

138

#### 139 **Illumina Miseq**

140 Samples that were classified as F41 based on the ONT data (described in the next section)  
141 were resequenced on the Illumina Miseq platform. An aliquot of the amplicons obtained in  
142 the DNA amplification section were used to generate libraries were generated using an  
143 Illumina library preparation kit as recommended by the manufacturer. Briefly, the amplicons  
144 were tagmented, indexed and amplified. The libraries were then normalized, pooled, and  
145 sequenced as paired end reads (2\*250bp).

146

#### 147 **Consensus genome generation and typing**

148 Consensus HAdV-F40/41 genomes using ONT sequence data were generated using a modified  
149 primer scheme with an adenovirus reference (NC\_001454) in the ARTIC field bioinformatics  
150 pipeline (<https://github.com/artic-network/fieldbioinformatics>) with a minimum read depth  
151 of 20x. The fast5 reads were basecalled and demultiplexed as the run progressed on the  
152 GridION machine with Guppy v.6.1.5. The reads in FASTQ format were then filtered based on

153 the length (1200bp) and then mapped to the NC\_001454 reference genome using minimap2  
154 v.2.2.4. Variant calling and pre-consensus genome generation were performed using bcftools  
155 v.1.10.2 and then polishing and final consensus generation were performed using medaka  
156 v.1.0.3 as previously described (19).

157

158 MetaSPAdes v3.13.2 was used to de novo assemble the Illumina reads  
159 (<https://github.com/ablab/spades>). The reads were trimmed using QUASR v.7.03 to remove  
160 low quality reads, adapters, and primer sequences. The reads were then assembled using the  
161 default parameters on MetaSPAdes. The genomes generated from the scaffolds were then  
162 used as references and the raw reads mapped against them to check the integrity of the  
163 genomes and generate final consensus sequences.

164

165 BLASTN was used to identify the closest match for each genome in the standard nucleotide  
166 nr/nt database on NCBI (<https://blast.ncbi.nlm.nih.gov/>).

167

### 168 **Phylogenetic analysis**

169 Only HAdV sequences with a genome coverage of  $\geq 80\%$  were utilized for phylogenetic  
170 analysis. There was a significant correlation between genome coverage and Ct value for HADV-  
171 F40, unlike for HAdV-F41 (**supplementary figure 1**). The sequences were compared against  
172 111 F41 and 5 F40 genomes on GenBank as of 20<sup>th</sup> September 2022 with  $\geq 80\%$  genome  
173 coverage (**Supplementary table 1**). Multiple sequence alignments were generated using  
174 mafft v7.487 (<https://mafft.cbrc.jp/alignment/software/>). The alignments were used to  
175 generate maximum likelihood (ML) phylogenies with 1000 bootstraps on IQTREE v2.1.3  
176 (<http://www.iqtree.org/>) using the GTR model. The ML phylogenies were visualized using the  
177 package "ggtree" v2.4.2 (<https://github.com/YuLab-SMU/ggtree>) in R ([https://www.r-](https://www.r-project.org/)  
178 [project.org/](https://www.r-project.org/)). F40/41 genotypes were assigned based on closest hit on BLASTN and clustering  
179 of the genome on the ML tree. F41 lineages were assigned based on previously established  
180 clusters and new lineages proposed for the newly observed clusters. The F40 lineages were  
181 defined based on the clustering on the ML trees and the SNPs observed in the alignments.

182

### 183 **Recombination analysis**

184 Recombination was checked using the RDP4 software and included all the detection methods  
185 i.e RDP, GENECONV, Bootscan, Maxchi, Chimaera, SiScan, PhylPro, LARD and 3seq (21).  
186 Simplot++ ([https://github.com/Stephane-S/Simplot\\_PlusPlus](https://github.com/Stephane-S/Simplot_PlusPlus)) was used to show similarity  
187 plots using a window and step size of 500bp and 100bp respectively (22). Snipit was used to  
188 visualize the mutations relative to a reference sequence  
189 (<https://github.com/aineniamh/snipit>).

190

### 191 **Statistical Analysis**

192 All statistical analyses were performed using R version 4.1.1 (23). Comparisons among groups  
193 were made using  $\chi^2$  statistics and a  $p$  value of  $<0.05$  was considered statistically significant.  
194 Vesikari Clinical Severity Scoring System Manual was used to assess disease severity by taking  
195 into account parameters including duration and episodes of diarrhoea and vomiting,  
196 dehydration, fever, and treatment status (24). The disease severity categories were mild,  
197 moderate and severe for scores of  $<7$ , 7-10 and  $\geq 11$  respectively (24).



198 **Results**

199 **Diarrhoeal cases and HAdV F genotypes in Kenya**

200 Diarrhoea cases were documented across the years studied, with peaks observed between  
 201 July and September (**Figure 1a**). Healthcare workers' strikes interrupted sample collection in  
 202 2013, 2016 and 2017 and the COVID-19 pandemic affected sample collection in 2020 and  
 203 early 2021 (25). Seventy-eight newly generated HAdV-F genomes were classified into either  
 204 single genotype 40 (n=36, 43%) or 41 (n=42, 51%) samples using BLASTN and phylogenetic  
 205 clustering on trees (**Figure 1b**). Five samples had a coinfection of F40 and 41 genotypes, and  
 206 one sample had a coinfection of F41 and B7 genotypes. The coinfections were investigated  
 207 and confirmed by De Novo assembly and investigation of reads from both ONT and Illumina  
 208 platforms. Among the five participants with the F40 and 41 coinfections, three had severe  
 209 diarrhoeal disease (**Table 1**). Further, two participants with F40 and 41 coinfections were also  
 210 positive for rotavirus and had moderate and severe diarrhoeal disease (**Table 1**).

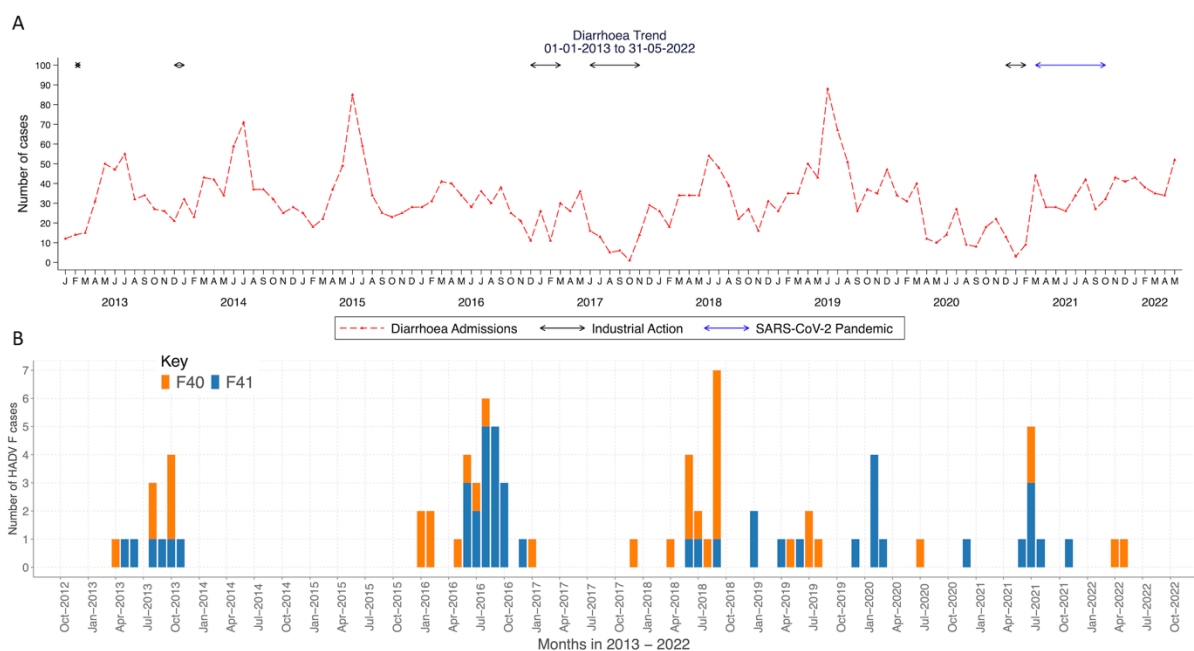

211 **Figure 1: Temporal distribution of diarrhoea cases and HAdV-F40/41 cases in children under**  
 212 **the age of 13 years in Kilifi, Kenya. Panel a)** A line graph showing the monthly number of  
 213 diarrhoea cases in Kilifi, Kenya from January 2013 to May 2022. The y-axis represents number  
 214 of diarrhoea cases, and the x-axis represents months. **Panel b)** Monthly human adenovirus  
 215 F40 and F41 cases observed in Kilifi, Kenya from January to December 2013, and January 2016  
 216 to May 2022. The y-axis shows the absolute number of HAdV F40 and F41 cases and the x-  
 217 axis shows time in months.

219

220 There were no significant differences in gender, age strata, outcome and disease severity  
221 between the cases infected with either HAdV F40 or 41 ( $P > 0.05$ ) (**Table 1**). HAdV F40/41 and  
222 rotavirus coinfections were detected in 10 samples (12%). Of these, six were coinfections with  
223 F41 genotype (n=6). One child with HAdV-F41 and rotavirus coinfection had severe  
224 dehydration and was unconscious at the time of admission, and eventually died; the other  
225 children were treated and discharged. None of the children had jaundice as one of their illness  
226 symptoms at the time of admission.

227

228 **Table 1: Demographic characteristics of human F40/41 in children under the age of 13**  
229 **years in Kilifi Kenya**

|                              | F40 (n=36)      | F41 (n=42)      | Coinfection (n=5) | Total (n=83)    | P value |
|------------------------------|-----------------|-----------------|-------------------|-----------------|---------|
| <b>Gender</b>                |                 |                 |                   |                 | 0.05    |
| Female                       | 21 (58.3%)      | 13 (31.0%)      | 2 (40.0%)         | 36 (43.4%)      |         |
| Male                         | 15 (41.7%)      | 29 (69.0%)      | 3 (60.0%)         | 47 (56.6%)      |         |
| <b>Age (months)</b>          |                 |                 |                   |                 |         |
| <b>Median (IQR)</b>          | 13.2 (8.2-21.6) | 15.2 (9.0-19.6) | 17.8 (16.3-21.6)  | 15.2 (8.8-21.2) |         |
| <b>Age strata (months)</b>   |                 |                 |                   |                 | 0.2     |
| <12                          | 16 (44.4%)      | 13 (31.0%)      | 0 (0.0%)          | 29 (34.9%)      |         |
| 12-23                        | 14 (38.9%)      | 21 (50.0%)      | 4 (80.0%)         | 39 (47.0%)      |         |
| 24-59                        | 3 (8.3%)        | 7 (16.7%)       | 1 (20.0%)         | 11 (13.3%)      |         |
| >60                          | 3 (8.3%)        | 1 (2.4%)        | 0 (0.0%)          | 4 (4.8%)        |         |
| <b>Disease severity</b>      |                 |                 |                   |                 | 0.8     |
| Moderate                     | 17 (47.2%)      | 22 (52.4%)      | 2 (40.0%)         | 41 (49.4%)      |         |
| Severe                       | 19 (52.8%)      | 20 (47.6%)      | 3 (60.0%)         | 42 (50.6%)      |         |
| <b>Outcome</b>               |                 |                 |                   |                 | 0.4     |
| Alive                        | 30 (83.3%)      | 38 (90.5%)      | 5 (100.0%)        | 73 (88.0%)      |         |
| Dead                         | 6 (16.7%)       | 4 (9.5%)        | 0 (0.0%)          | 10 (12.0%)      |         |
| <b>Rotavirus coinfection</b> |                 |                 |                   |                 | 0.06    |
| Positive                     | 2 (5.6%)        | 6 (14.3%)       | 2 (40.0%)         | 10 (12.0%)      |         |
| Negative                     | 34 (94.4%)      | 34 (81.0%)      | 3 (60.0%)         | 71 (85.5%)      |         |
| No data                      | 0 (0.0%)        | 2 (4.8%)        | 0 (0.0%)          | 2 (2.4%)        |         |

230 **Diversity of HAdV-F in coastal Kenya**

231 To determine the diversity of HAdV-F40/41 in coastal Kenya, we combined the coastal  
232 sequences with a global dataset (n=118) to give context to the newly generated genomes. We  
233 observed the clustering patterns of the coastal Kenya sequences on the global maximum  
234 likelihood phylogenetic trees and identified lineages within HAdV-F40/41. We also analysed  
235 the mutation profiles in each protein relative to a reference genome to identify synonymous  
236 and non-synonymous mutations within and between the lineages.

237 **HAdV-F40**

238 Five major clusters were observed from the global phylogenetic tree (**Figure 2**). The  
239 synonymous and non-synonymous substitutions relative to the HAdV-F reference  
240 (NC\_001454.1) that were characteristic for each cluster are summarized in **supplementary**  
241 **table 2 and supplementary figure 2**. Each of these clusters was assigned as a lineage. The  
242 Kenyan sequences, clustered with lineages 1, 2 and 3, with one global sequence observed in  
243 lineage 1 from Bangladesh (**Figure 2A**). Lineages 4 and 5 were purely non-Kenyan sequences

244 with lineage 4 comprised of genomes from South Africa. Varied genetic divergence was  
 245 observed between lineages 1 to 4 (**Supplementary figure 4**). The nucleotide percent similarity  
 246 was 99.52% (nucleotide differences (nd) = 163), 99.95% (nd = 14), 99.76% (nd = 80), and  
 247 99.89% (nd = 37) for lineages 1 to 4 respectively, and 99.06% among all the five lineages.  
 248

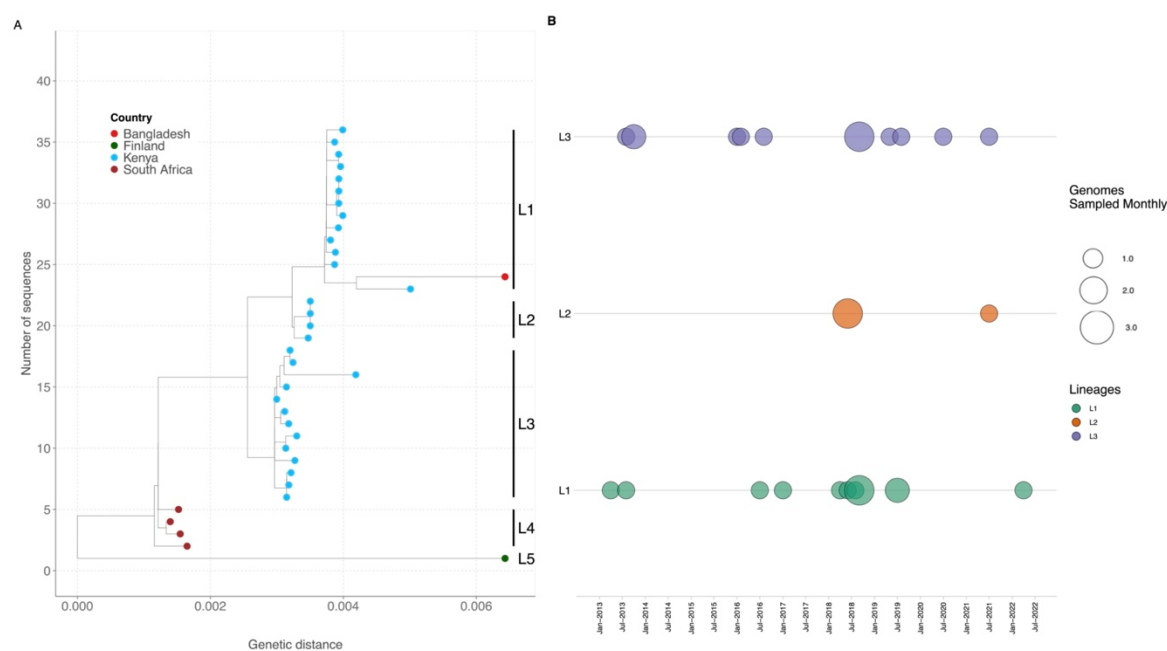

249  
 250 **Figure 2:** Maximum likelihood phylogenetic tree showing the genetic relatedness of HAdV-  
 251 F40 genotypes when using the whole genome sequence. The tips are colored by country. **B.**  
 252 Temporal distribution of HAdV-F40 lineages in sequenced samples from January to December  
 253 2013 and January 2016 to May 2022.

254  
 255 No amino acid differences were observed in the hexon gene of the Kenyan sequences among  
 256 lineages 1 to 3 (**Supplementary table 2**). However, within the long fiber protein, lineage 2  
 257 sequences had an additional S81T amino acid mutation that was not observed lineages 1 and  
 258 3 while lineage 3 lacked the V120I mutation observed in lineage 1 and 2. Within lineage 1,  
 259 sequence MN\_968817.1 (Dhaka, BGD) and OP581380.1 (Kenya) contained additional showed  
 260 more divergence compared to the other sequences and lacked synonymous substitutions  
 261 observed within the short and long fiber proteins (**Supplementary Figure 2**). The mutation

262 profile for the five lineages showed that lineage 2 contained polymorphic sites that contained  
263 either lineage 1 or 3 mutation profiles suggesting intertypic recombination (**Supplementary**  
264 **Figure 2**). Lineages 1 and 3 were in circulation throughout the study period with lineage 2  
265 observed in 2018 and 2021 (**Figure 2B**).

266

#### 267 **HAdV-F41**

268 Five lineages, 1, 2A, 2B, 3A and 3B, had been previously defined (16). The Kilifi HAdV F41  
269 sequences clustered with global sequences characterized as lineage 1 (n=1), lineage 2A (n=14)  
270 and lineage 3A (n=4). Eleven sequences clustered within lineage 3 but neither with previously  
271 defined lineages 3A nor 3B. We propose these sequences be assigned new HAdV F41 lineages  
272 3C and 3D (**Figure 3A**). Nonsynonymous and synonymous substitutions relative to sequence  
273 KF303070.1 (NY/2010, within lineage 2A) characteristic for each lineage were identified in  
274 multiple proteins (**Supplementary figure 3 and supplementary table 3**). A lot of the amino  
275 acid differences were observed in the hexon, 100K, E3-19·4K, E3-31·6K, E3-14·5K, short and  
276 long fiber, and E4-orf6 proteins (**Supplementary table 3**). The varied genetic divergence  
277 among the lineages has been shown in **supplementary figure 5**.

278

279

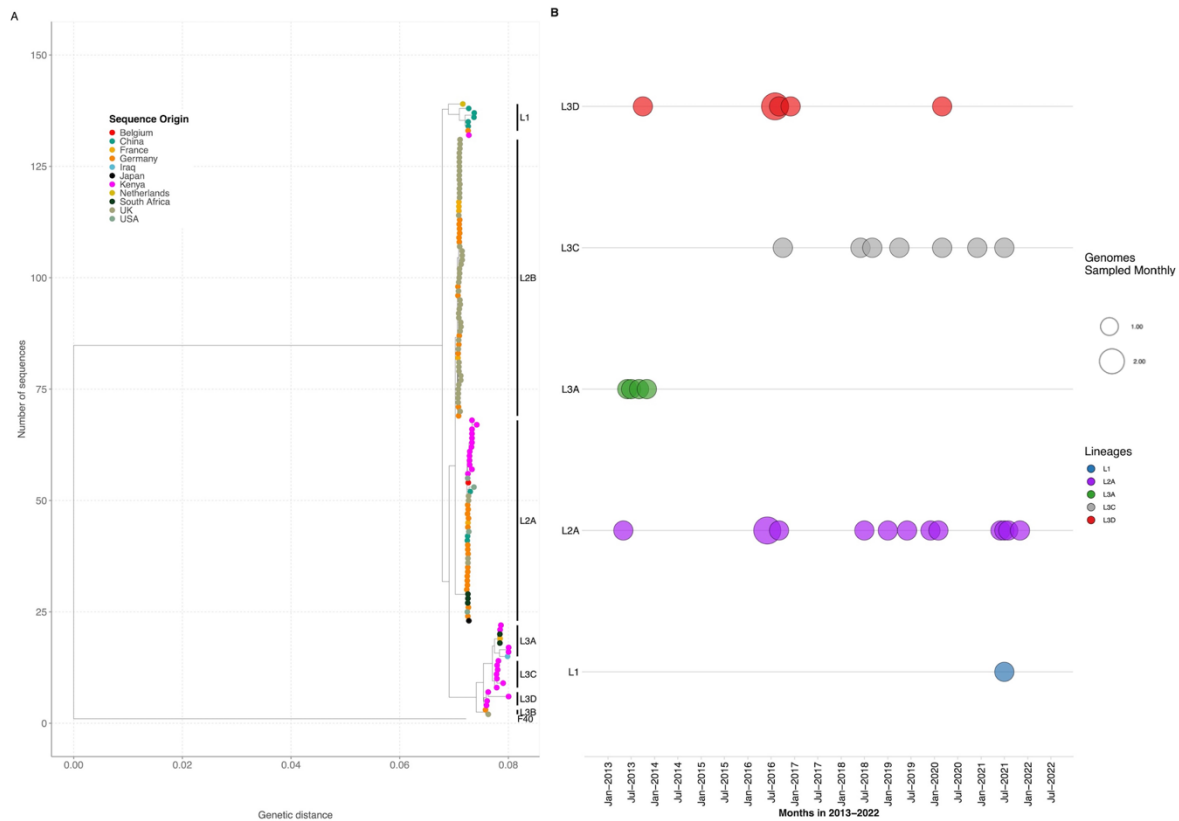

280

281 **Figure 3:** Maximum likelihood phylogenetic trees showing the diversity within the HAdV-F41  
 282 genotypes when using the whole genome sequence. The tips are colored by country. **B.**  
 283 Temporal distribution of HAdV-F41 lineages in sequenced samples from January to December  
 284 2013 and January 2016 to May 2022.

285

286 In the Kenyan sequences, lineage 1 was only observed in 2021, lineage 3A in 2013, lineage 3D  
 287 in 2013 and 2016, and lineage 3C from 2016 to 2021 (**Figure 3B**). Notably, lineage 2A was  
 288 persistent across the study period.

289 The nucleotide percent identity for the newly proposed lineages is 99.87% (nd=44) and  
 290 99.85% (nd=50) for lineage 3C and 3D respectively. The percent nucleotide identity for the  
 291 other lineages, 1, 2A, 2B and 3A, has been previously described and ranges from 99.6% to  
 292 99.9% (16). Within lineage diversity for each of the lineages is shown in **supplementary figure**  
 293 **6.**

294

### 295 **Recombination analysis**

296 To investigate the possibility of recombination among the HAdV-F40 lineage 2 genomes based  
 297 on the observed mutation profiles and clustering on the phylogenetic tree, we ran a

298 recombination analysis using the RDP4 software. Two sequences were flagged as  
299 recombinants between HAdV-F40 lineage 1 (Major parent) and lineage 3 (Minor parent). The  
300 recombination was significant by RDP ( $p=0.00055$ ), GENECONV ( $p=0.0179$ ), Maxchi ( $p=0.006$ ),  
301 Chimaera ( $p=0.003$ ), SiScan ( $p=0.039$ ) and 3seq ( $p=0.000013$ ). The mutation profile and  
302 similarity plot of the recombinant sequences shows switching of polymorphisms between  
303 lineage 1 and 3 sequences (**Supplementary figure 2 and 6**).

## 304 Discussion

305 We report on the genomic epidemiology of HAdV F40/41 genotypes and recombination in  
306 viruses detected in hospitalised children under 13 years of age on the Kenya Coast. The  
307 observed genomic diversity has not been observed elsewhere globally. HAdV F40/41  
308 genotypes co-circulated similar to what has been reported elsewhere (7–10). In previous  
309 studies, the proportion of F40 in sequenced HAdV-F positive samples was lower compared to  
310 compared to F41 (3-36% vs 11-97%) partly due to the higher genetic diversity in the F41  
311 genotype that is hypothesised to enable it to outcompete F40 potentially via immune escape  
312 (7–11). A similar finding of lower F40 diversity was observed in our study. Further, the  
313 proportion of HAdV-F positive samples with a single genotype F40 infection was 41% which is  
314 higher than what has been previously described.

315  
316 A coinfection between HAdV-40 and 41 has only been reported in Brazil (one sample) (10).  
317 We observed coinfections between F40 and 41 genotypes in five individuals who had  
318 moderate to severe disease (none were fatal), suggesting that coinfections do not necessarily  
319 lead to worse outcomes. Notably, reference-based genome assembly from reads in samples  
320 with coinfections generated genomes which have an anomalous phylogenetic placement,  
321 which we deconvoluted by *de novo* assembly (result not shown). Therefore, scientists and  
322 clinicians working in high adenovirus transmission settings should have a high suspicion of  
323 coinfection when they see strains which appear to be F40 x 41 recombinants and consider *de*  
324 *nov*o assembly pipelines to pick up these coinfections.

325  
326 This study contributes to the number of both HAdV-F40 and F41 genomes available on public  
327 sequence database (GenBank) four-fold. Previously, only six near complete genomes were  
328 available for HAdV-F40, our study contributes to xx additional genomes. The Kenyan HAdV-  
329 F40 sequences clustered into 3 major clusters that we defined as Lineage 1 to 3 and only one  
330 global sequence (MN968817.1-Dhaka) clustered within lineage 1. The other two lineages are  
331 purely Kenyan lineages not previously observed elsewhere (16). Over the 10-year period  
332 studied here, the co-circulation of F40 lineages 1 and 3 shows the sustained diversity of HAdV-  
333 F strains in coastal Kenya. The Kenyan HAdV-F41 genomes clustered within three previously  
334 defined lineages, 1, 2a and 3a, with none of the sequences clustering within lineage 2a and  
335 3b, which are mainly from Europe (16). Two additional clusters composed exclusively of



336 Kenyan sequences were observed within lineage 3 and these were not observed elsewhere  
337 globally. We have designated these two clusters as lineages 3c and 3d. Interestingly, we  
338 observe lineage replacement within the lineage 3 sub-types over time. Co-circulation and  
339 replacement of multiple HAdV-F41 strains in different genome type clusters based on the  
340 fiber gene has also been reported India between 2013 and 2020 (11,26).

341  
342 HAdV-F40 lineage 2 sequences were recombinants between lineage 1 and lineage 3  
343 sequences, and their mutation profile showed shared polymorphic sites with either of the  
344 parent lineages. The co-circulation of lineage 1 and 3 HAdV-F40 viruses could have led to the  
345 emergence of F40 recombinants. Recombination in HAdV-F40 suggests that fragment  
346 sequencing is not the best method for genotyping and lineage assignment as the  
347 recombination events may miscue visualization of the evolutionary relationships depending  
348 on the fragment sequenced.

349  
350 None of the children in this study had jaundice at the time of admission between 2013 and  
351 2022. Previous studies early in 2022 have reported human adenovirus infections among  
352 children with acute hepatitis and further studies in the coastal Kenya should investigate such  
353 cases in the future (18).

354  
355 The study had two limitations. First, the genomes had amplicon dropouts meaning portions  
356 of the genome were missed and redesigning of the primers will help recover complete  
357 genomes. Finally, samples from 2014 and 2015 were not screened and tested hence some  
358 key information on the diversity of HAdV-F may have been missed from that period.

359  
360 In conclusion, this study shows that there is high genetic diversity of both HAdV-F40 and F41  
361 in co-circulation in Kenya, coupled with intratypic recombination events that may have led to  
362 the emergence of new lineages. The observed genetic diversity and recombination events  
363 necessitate the need for continuous genomic surveillance to track HAdV-F strains, to inform  
364 policy and future HAdV-F studies and develop vaccines that match what is locally circulating.  
365 In addition, the study highlights the importance of storing samples and using infrastructure  
366 from other projects, as this helps fill the knowledge gaps in the genetic diversity of pathogens  
367 through whole genome sequencing across the African continent.

368 **Contributors**

369 Conceptualization: CNA, CJH and AWL. Methodology: AWL, JQ, CJH and CNA. Formal analysis:  
370 AWL, NM, CJH and CNA. Investigation: A.W.L, TM, RC and MM. Resources: DJN, GG, JQ and  
371 CNA. Data curation: AWL and NM. Visualization: AWL and NM. Supervision, CJH and CNA.  
372 project administration, CNA. Funding acquisition: CNA, GG and DJN. Writing—original draft  
373 preparation: AWL. All authors were involved in reviewing and editing the manuscript and  
374 agreed to submit the final version for publication.

375

376 **Data sharing**

377 All the genomes were checked for the presence of all expected HAdV-F CDS and annotated  
378 using Geneious Prime® 2022.2.1. The genomes were then deposited to GenBank with the  
379 following accession numbers: OP581345 - OP581409. The epidemiological data is available on  
380 the VEC dataverse (<https://doi.org/10.7910/DVN/AMP10S>).

381

382 **Acknowledgements**

383 We acknowledge all participants and their parents/guardians for their contribution of study  
384 samples and members of the viral epidemiology and control research group ([http://virec-  
385 group.org/](http://virec-group.org/)) for their input in the study. For the purpose of Open Access, the author has  
386 applied a CC-BY public copyright licence to any author accepted manuscript version arising  
387 from this submission.

388

389 **Funding information**

390 This study was funded by The Wellcome Trust [102975, 203077]. Dr Charles Agoti was  
391 supported by the Initiative to Develop African Research Leaders (IDeAL) through the DELTAS  
392 Africa Initiative [DEL-407 15-003]. The DELTAS Africa Initiative is an independent funding  
393 scheme of the African Academy of Sciences (AAS)'s Alliance for Accelerating Excellence in  
394 Science in Africa (AESA) and supported by the New Partnership for Africa's Development  
395 Planning and Coordinating Agency (NEPAD Agency). Dr. Charlotte J. Houldcroft was supported  
396 by funding from the Department of Genetics, University of Cambridge. Dr. Josh Quick was  
397 supported by funding from the UK Research and Innovation body. The views expressed in this  
398 report are those of the authors and not necessarily those of AAS, NEPAD Agency, The  
399 Wellcome, UKRI, University of Cambridge and the UK government.

400 **Declaration of Interest:** The authors declare no competing interests.

## References

- 401 1. Institute for Health Metrics and Evaluation I. Default results are global all-cause  
402 deaths and DALYs for 2019 with trends since 1990 [Internet]. [cited 2022 Sep 27].  
403 Available from: <https://vizhub.healthdata.org/gbd-results/>
- 404 2. Kidd AH, Berkowitz FE, Blaskovič PJ, Schoub BD. Genome variants of human  
405 adenovirus 40 (subgroup F). *J Med Virol*. 1984;14(3):235–46.
- 406 3. Rafie K, Lenman A, Fuchs J, Rajan A, Arnberg N, Carlson LA. The structure of enteric  
407 human adenovirus 41 — A leading cause of diarrhea in children. *Sci Adv*. 2021;7(2):1–  
408 13.
- 409 4. Agoti CN, Curran MD, Murunga N, Ngari M, Muthumbi E, Lambisia AW, et al.  
410 Differences in epidemiology of enteropathogens in children pre- and post-rotavirus  
411 vaccine introduction in Kilifi, coastal Kenya. *Gut Pathog* [Internet]. 2022 Dec  
412 1;14(1):32. Available from:  
413 <https://gutpathogens.biomedcentral.com/articles/10.1186/s13099-022-00506-z>
- 414 5. Lambisia AW, Onchaga S, Murunga N, Lewa CS, Nyanjom SG, Agoti CN.  
415 Epidemiological trends of five common diarrhea-associated enteric viruses pre-and  
416 post-rotavirus vaccine introduction in coastal Kenya. *Pathogens*. 2020;9(8):1–14.
- 417 6. Hung-Yueh Y, Pieniazek N, Pieniazek D, Gelderblom H, Luftig RB. Human adenovirus  
418 type 41 contains two fibers. *Virus Res* [Internet]. 1994 Aug;33(2):179–98. Available  
419 from: <https://linkinghub.elsevier.com/retrieve/pii/016817029490054X>
- 420 7. Gelaw A, Pietsch C, Liebert UG. Genetic diversity of human adenovirus and human  
421 astrovirus in children with acute gastroenteritis in Northwest Ethiopia. *Arch Virol*  
422 [Internet]. 2019;164(12):2985–93. Available from: [https://doi.org/10.1007/s00705-](https://doi.org/10.1007/s00705-019-04421-8)  
423 019-04421-8
- 424 8. La Rosa G, Della Libera S, Petricca S, Iaconelli M, Donia D, Saccucci P, et al. Genetic  
425 Diversity of Human Adenovirus in Children with Acute Gastroenteritis, Albania, 2013–  
426 2015. *Biomed Res Int*. 2015;2015:1–7.
- 427 9. Tang X, Hu Y, Zhong X, Xu H. Molecular Epidemiology of Human Adenovirus,  
428 Astrovirus, and Sapovirus Among Outpatient Children With Acute Diarrhea in  
429 Chongqing, China, 2017–2019. *Front Pediatr*. 2022;10(March):2017–9.
- 430 10. Tahmasebi R, Luchs A, Tardy K, Hefford PM, Tinker RJ, Eilami O, et al. Viral  
431 gastroenteritis in Tocantins, Brazil: Characterizing the diversity of human adenovirus F  
432 through next-generation sequencing and bioinformatics. *J Gen Virol*.  
433 2021;101(12):1280–8.
- 434 11. Chandra P, Lo M, Mitra S, Banerjee A, Saha P, Okamoto K, et al. Genetic  
435 characterization and phylogenetic variations of human adenovirus-F strains  
436 circulating in eastern India during 2017–2020. *J Med Virol*. 2021;93(11):6180–90.
- 437 12. Dehghan S, Seto J, Liu EB, Ismail AM, Madupu R, Heim A, et al. A Zoonotic Adenoviral  
438 Human Pathogen Emerged through Genomic Recombination among Human and  
439 Nonhuman Simian Hosts. *J Virol*. 2019;93(18).
- 440 13. Lukashov AN, Ivanova OE, Ereemeeva TP, Iggo RD. Evidence of frequent recombination  
441 among human adenoviruses. *J Gen Virol*. 2008;89(2):380–8.
- 442 14. Singh G, Robinson CM, Dehghan S, Jones MS, Dyer DW, Seto D, et al. Homologous  
443 Recombination in E3 Genes of Human Adenovirus Species D. *J Virol*.  
444 2013;87(22):12481–8.
- 445 15. Yang J, Mao N, Zhang C, Ren B, Li H, Li N, et al. Human adenovirus species C  
446 recombinant virus continuously circulated in China. *Sci Rep*. 2019;9(1):1–8.

- 447 16. Götting J, Cordes AK, Steinbrück L, Heim A. Molecular Phylogeny of human  
448 adenovirus type 41 lineages. bioRxiv [Internet]. 2022;2022.05.30.493978. Available  
449 from:  
450 <https://www.biorxiv.org/content/10.1101/2022.05.30.493978v1%0Ahttps://www.biorxiv.org/content/10.1101/2022.05.30.493978v1.abstract>  
451  
452 17. World Health organization - WHO. [https://www.who.int/emergencies/disease-](https://www.who.int/emergencies/disease-outbreak-news/item/2022-DON376)  
453 [outbreak-news/item/2022-DON376](https://www.who.int/emergencies/disease-outbreak-news/item/2022-DON376). 2022. 2022.
- 454 18. Gutierrez Sanchez LH, Shiao H, Baker JM, Saaybi S, Buchfellner M, Britt W, et al. A  
455 Case Series of Children with Acute Hepatitis and Human Adenovirus Infection. *N Engl*  
456 *J Med* [Internet]. 2022; Available from:  
457 <http://www.ncbi.nlm.nih.gov/pubmed/35830653>
- 458 19. Mailis M, Fahad K, Sam, AJ. W, Andrew S, Ganna K, Gordon D, et al. Enteric  
459 adenovirus F41 genetic diversity comparable to pre-COVID-19 era\_ validation of a  
460 multiplex amplicon-MinION sequencing method. *OSF-Preprints* [Internet]. Available  
461 from: <https://osf.io/6jku5>
- 462 20. Quick J. nCoV-2019 sequencing protocol v2 (GunIt). [Internet]. *protocols.io*. 2020  
463 [cited 2022 Jun 5]. Available from: <https://dx.doi.org/10.17504/protocols.io.bdp7i5rn>
- 464 21. Martin DP, Murrell B, Golden M, Khoosal A, Muhire B. RDP4: Detection and analysis  
465 of recombination patterns in virus genomes. *Virus Evol.* 2015;1(1):1–5.
- 466 22. Samson S, Lord É, Makarenkov V. SimPlot++: a Python application for representing  
467 sequence similarity and detecting recombination. *Bioinformatics.* 2022;38(11):3118–  
468 20.
- 469 23. Team RC. *R: A Language and Environment for Statistical Computing*. Vienna, Austria.  
470 2019;
- 471 24. Lewis K. Vesikari Clinical Severity Scoring System Manual. *Path* [Internet].  
472 2011;(May):1–50. Available from:  
473 [https://www.path.org/publications/files/VAD\\_vesikari\\_scoring\\_manual.pdf](https://www.path.org/publications/files/VAD_vesikari_scoring_manual.pdf)
- 474 25. Khagayi S, Omoro R, Otieno GP, Ogwel B, Ochieng JB, Juma J, et al. Effectiveness of  
475 monovalent rotavirus vaccine against hospitalization with acute rotavirus  
476 gastroenteritis in Kenyan children Authors. 2019;
- 477 26. Banerjee A, De P, Manna B, Chawla-Sarkar M. Molecular characterization of enteric  
478 adenovirus genotypes 40 and 41 identified in children with acute gastroenteritis in  
479 Kolkata, India during 2013–2014. *J Med Virol.* 2017;89(4):606–14.  
480

481 **Supplementary data**

482 **Supplementary table 1:** Information on the global reference sequences used in generating  
483 the phylogenetic tree.

484

485 **Supplementary table 2:** Amino acid substitutions identified relative to NC\_001454.1 in  
486 majority of sequences in the HAdV-F40 lineages per protein.

487

488 **Supplementary table 3:** Amino acid substitutions identified relative to KF303070.1  
489 (NY/2010, within lineage 2A) in majority of sequences in the HAdV-F41 lineages per protein.

490

491 **Supplementary figure 1:** Correlation between genome coverage and the diagnostic real-time  
492 PCR cycle threshold (Ct) value for HAdV-F40 and HAdV-F41. The dots are colored by HAdV  
493 genotype. There was a significant correlation between genome coverage and Ct value for  
494 HAdV-F40 but not for HAdV-F41 possibly due to primer failure.

495

496 **Supplementary figure 2:** An alignment showing SNPs across the HAdV-F40 protein sequences  
497 relative to published sequence NC\_001454.1. **(A)** control protein E1B 55K **(B)** capsid protein  
498 IX **(C)** E2B - DNA polymerase **(D)** Hexon protein **(E)** Short fiber **(F)** long fiber **(G)** E2B  
499 preterminal protein

500

501 **Supplementary figure 3:** An alignment showing SNPs across the HAdV-F41 coding strand  
502 sequences relative to published sequence KF303070.1 (NY/2010/4845). **(A)** Hexon protein **(B)**  
503 putative E4 ORF 6 **(C)** Long fiber **(D)** Short fiber **(E)** Penton

504

505 **Supplementary figure 4.** Maximum likelihood trees of HAdV-F40 lineages **(A)** 1, **(B)** 2, **(C)** 3  
506 and **(D)** 4. The tip shapes are colored by sequence origin.

507

508 **Supplementary figure 5.** Maximum likelihood trees of HAdV-F41 lineages **(A)** 1, **(B)** 2A, **(C)** 2B,  
509 **(D)**3A **(E)** 3C and **(F)** 3D. The tip shapes are colored by sequence origin.

510

511 **Supplementary figure 6:** Percent similarity of the HAdV-F40 recombinant sequences with  
512 Lineage 1 and lineage 3 parent sequences, using SimPlot++ software. The color code for each  
513 HAdV-F41 parent is shown on the bottom left margin.
